# Supplementary material for: Protective Effect of Castanopsis sieboldii Extract against UVB-Induced Photodamage in Keratinocytes
Source: MDPI journal article supplement (doi:10.3390/molecules28062842), 2023-03-21
Supplement: s1 [file s1]

## A) CSL1

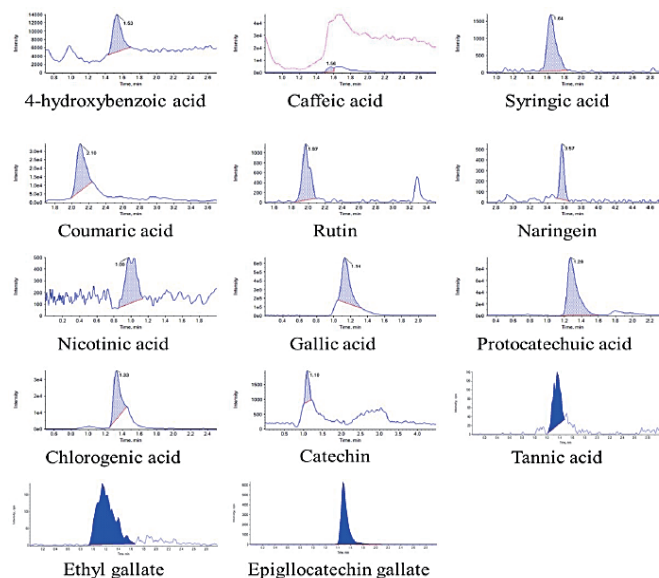

## B) CSL2

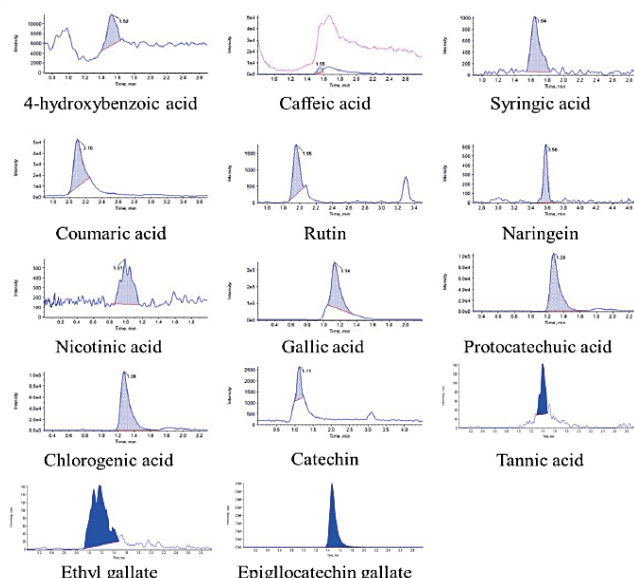

## C) CSL3

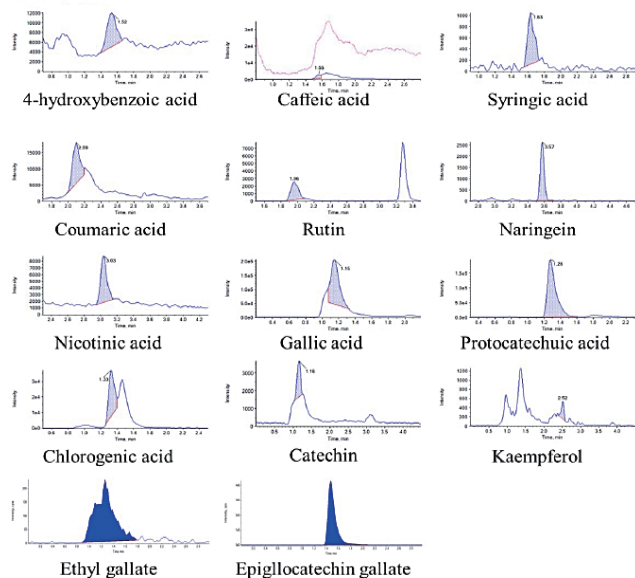

## D) CSL4

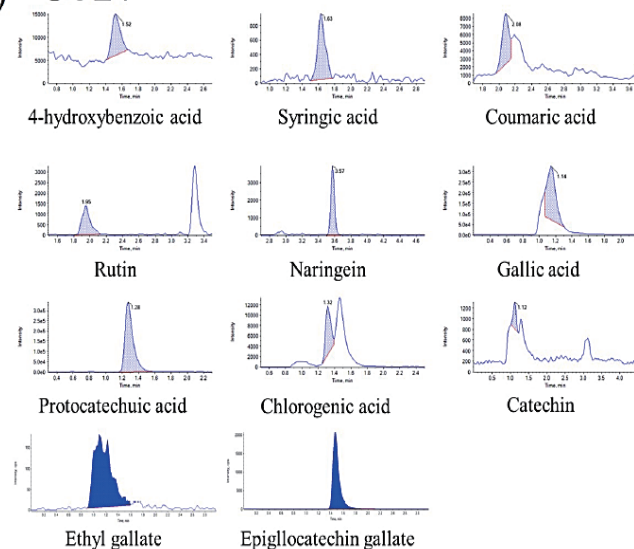

## E)

| No.          | Standard                 | Calculated Concentration (ug/g) |         |        |         |
|--------------|--------------------------|---------------------------------|---------|--------|---------|
|              |                          | CSL1                            | CSL2    | CSL3   | CSL4    |
| 1            | 4-hydroxy benzoic acid   | 17.14                           | 13.3    | 15.55  | 17.94   |
| 2            | Caffeic acid             | 50.46                           | 50.11   | 25.73  | -       |
| 3            | Syringic acid            | 211.3                           | 129.51  | 86.35  | 102.01  |
| 4            | Coumaric acid            | 46.97                           | 73.35   | 19.43  | 9.58    |
| 5            | Rutin                    | 14.15                           | 16.06   | 28.24  | 18.95   |
| 6            | Naringein                | 0.38                            | 0.54    | 2.85   | 4.14    |
| 7            | Nicotinic acid           | 5.72                            | 6.52    | 9.45   | -       |
| 8            | Gallic acid              | 2248.67                         | 1274.78 | 773.82 | 1252.83 |
| 9            | Protocatechuic acid      | 271.26                          | 274.41  | 497.03 | 816.21  |
| 10           | Chlorogenic acid         | 496.51                          | 523.94  | 448.35 | 134.5   |
| 11           | Catechin                 | 26.81                           | 45.06   | 54.7   | 11.69   |
| 12           | Kaempferol               | -                               | -       | 7.3    | -       |
| 13           | Tannic acid              | 2.2                             | 1.42    | -      | -       |
| 14           | Ethyl gallate            | 18.6                            | 14.8    | 25.4   | 19      |
| 15           | Epigallocatechin gallate | 25.1                            | 170     | 2270   | 87.6    |
| Total (ug/g) |                          | 3435.27                         | 2593.8  | 4264.2 | 2474.45 |

Supporting Figure 1 (Lee et al.)

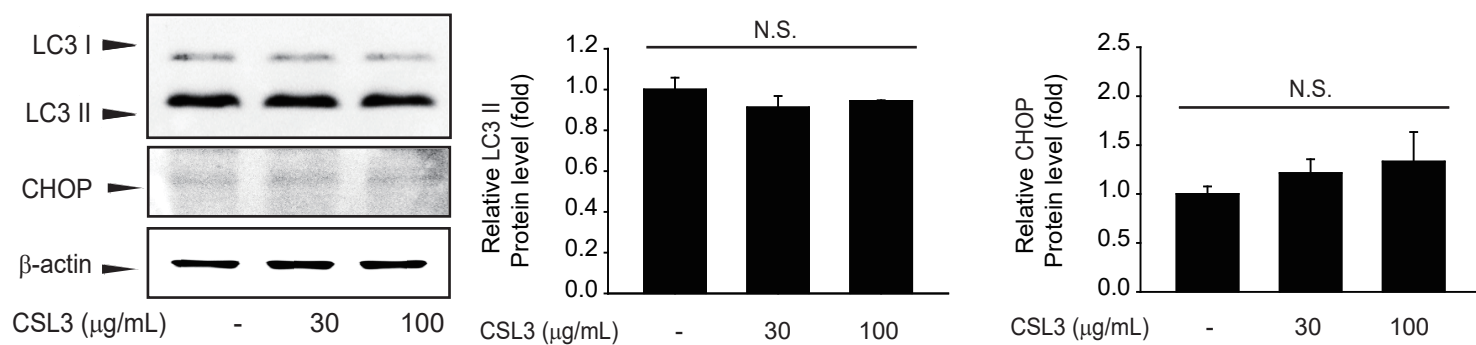

Supporting Figure 2 (Lee et al.)

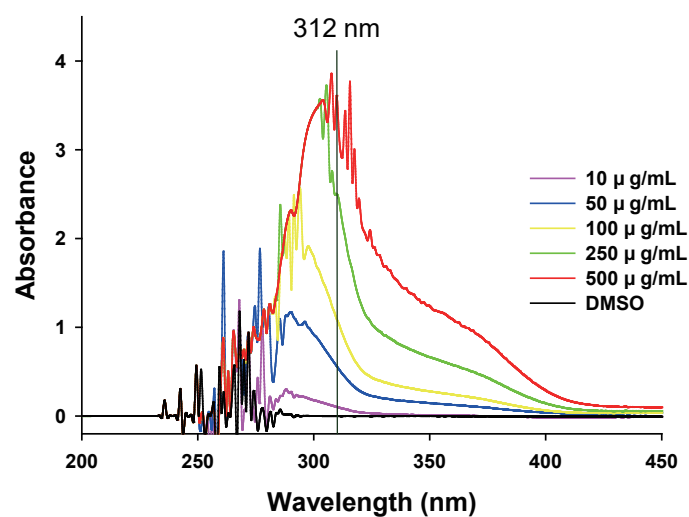

| No. | Concentration | AU (312nm)    |
|-----|---------------|---------------|
| 1   | 10 µg/mL      | 0.087 ± 0.002 |
| 2   | 50 µg/mL      | 0.487 ± 0.002 |
| 3   | 100 µg/mL     | 0.951 ± 0.001 |
| 4   | 250 µg/mL     | 2.215 ± 0.027 |
| 5   | 500 µg/mL     | 3.201 ± 0.285 |
| 6   | DMSO          | 0.001 ± 0.007 |

Supporting Figure 3 (Lee et al.)
